# Supplementary material for: Tuning the electronic properties of dppz-ligands and their palladium(ii) complexes
Source: Royal Society of Chemistry journal article supplement (doi:10.1039/b926233d), 2010-01-01
Supplement: b926233d.pdf [file b926233d.pdf]

## Tuning the Electronic Properties of dppz-Ligands and their Palladium(II) Complexes

Katharina Butsch,<sup>a</sup> Ronald Gust,<sup>b</sup> Axel Klein<sup>a\*</sup>, Ingo Ott,<sup>c</sup> and Marco Romanski<sup>a</sup>

### Supplementary Information

#### Supplementary Figures

**Figure S1.** Calculated (B3-LYP, TZVP) electron density for the LUMOs of tfmdppz (left), cdppz (middle) and dcdppz (right).

**Figures S2-S7.** Selected optical spectra (absorption, emission and excitation).

#### Supplementary Tables

**Table S1.** Complete data of absorption and luminescence measurements.

**Table S2.** Complete electrochemical data of free ligands and Pd<sup>II</sup> complexes. Potentials in V vs. ferrocene/ferrocinium from cyclic voltammetry or square wave voltammetry in 0.1 M DMF/*n*Bu<sub>4</sub>NPF<sub>6</sub> solutions at 298 K; Half wave potentials  $E_{1/2}$  given for reversible processes, cathodic peak potentials  $E_{pc}$  for irreversible processes.

**Table S3.** Short H...F contacts in the crystal structure of [(dppz)PdMe(Py)][SbF<sub>6</sub>]

*In Situ* measurement of [(tfmdppz)Pd(Me)(Acetone)]<sup>+</sup>: [(tfmdppz)Pd(Me)Cl] was suspended in 1 mL of (CD<sub>3</sub>)<sub>2</sub>CO and an excess of AgSbF<sub>6</sub> was added as a solid. After 5 min reaction time at room temperature the mixture was filtered and the solution was analysed with NMR spectroscopy.  $\delta_{\text{H}}$ (300 MHz; (CD<sub>3</sub>)<sub>2</sub>CO): 9.79 (1 H, m, H<sub>dppz8</sub>), 9.69 (1 H, m, H<sub>dppz1</sub>), 9.04 (1 H, m, H<sub>dppz6</sub>), 8.74 (1 H, s, H<sub>dppz10</sub>), 8.69 (1 H, m, H<sub>dppz3</sub>), 8.61 (1 H, m, H<sub>dppz13</sub>), 8.34 (1 H, m, H<sub>dppz12</sub>), 8.24 (2 H, m, H<sub>dppz2,7</sub>), 1.04 (3 H, s, H<sub>Pd-CH3</sub>).  $\delta_{\text{C}}$ (300 MHz; (CD<sub>3</sub>)<sub>2</sub>CO): 153.4 (1 C, d, C<sub>dppz6</sub>), 153.2 (1 C, d, C<sub>dppz6'</sub>), 150.9 (1 C, d, C<sub>dppz3</sub>), 150.6 (1 C, d, C<sub>dppz3'</sub>), 137.3 (1 C, d, C<sub>dppz8</sub>), 137.2 (1 C, d, C<sub>dppz8'</sub>), 136.5 (1 C, d, C<sub>dppz1</sub>), 136.3 (1 C, d, C<sub>dppz1'</sub>), 132.2 (1 C, d, C<sub>dppz2</sub>), 132.0 (1 C, d, C<sub>dppz2</sub>), 132.0 (1 C, d, C<sub>dppz13</sub>), 128.4 (1 C, d, C<sub>dppz7</sub>), 128.2 (1 C, d, C<sub>dppz7'</sub>), 128.0 (1 C, d, C<sub>dppz10</sub>), 127.8 (1 C, d, C<sub>dppz12</sub>), 3.3 (1 C, q, C<sub>Pd-CH3</sub>).

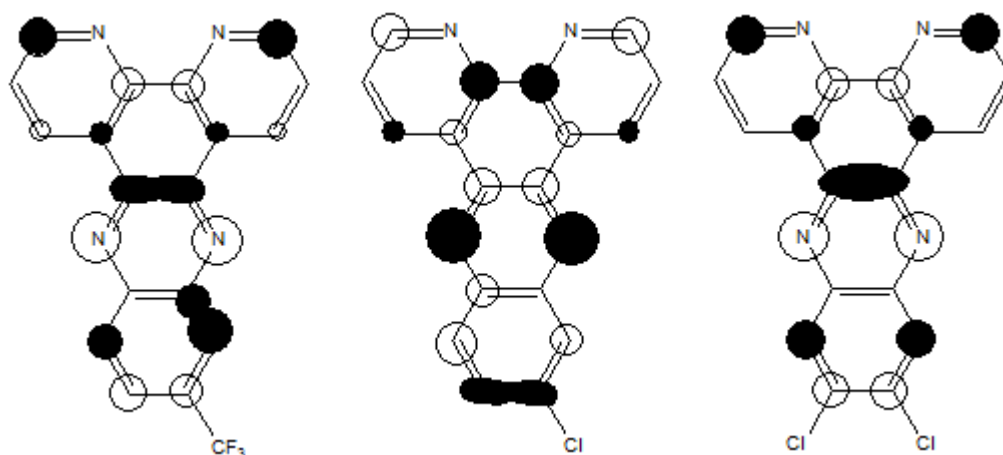

**Figure S1.** Calculated (B3-LYP, TZVP) electron density for the LUMOs of tfmdppz (left), cdppz (middle) and dcdppz (right).

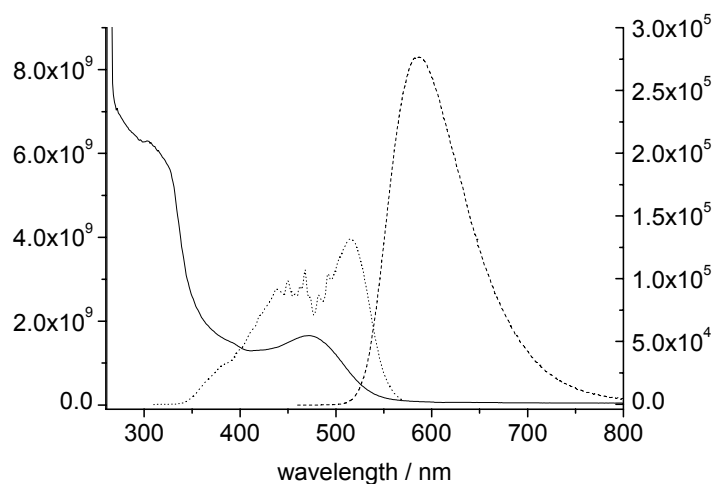

**Figures S2.** Absorption (solid), emission (dashed) and excitation (dotted) spectra of  $[(adppz)Pd(Me)(Caf)][SbF_6]$  measured in DMF solution at room temperature.

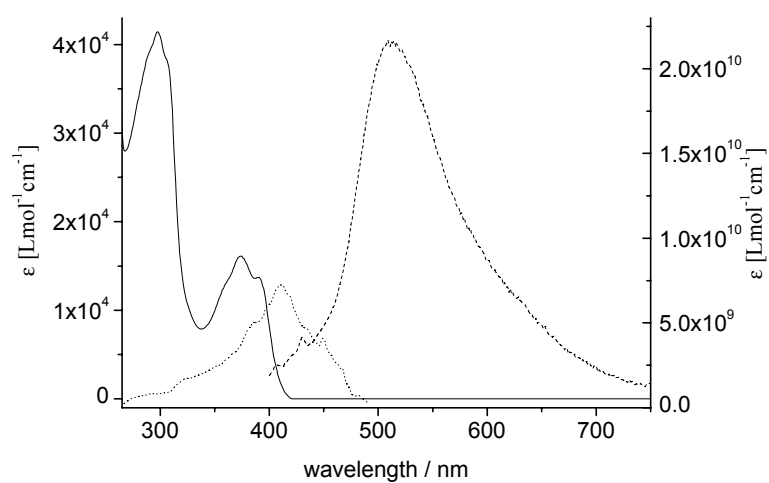

**Figure S3.** Absorption (solid), emission (dashed) and excitation (dotted) spectra of ndppz measured in DMF solution at room temperature

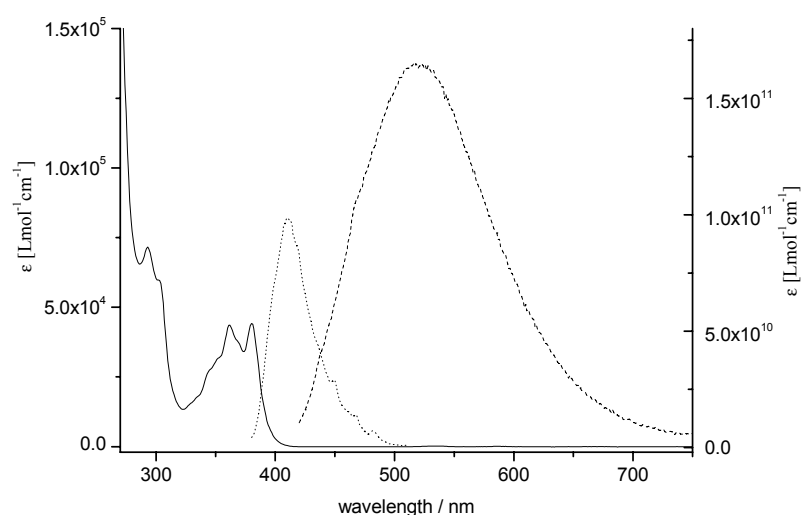

**Figure S4.** Absorption (solid), emission (dashed) and excitation (dotted) spectra of tfmdppz measured in DMF solution at room temperature

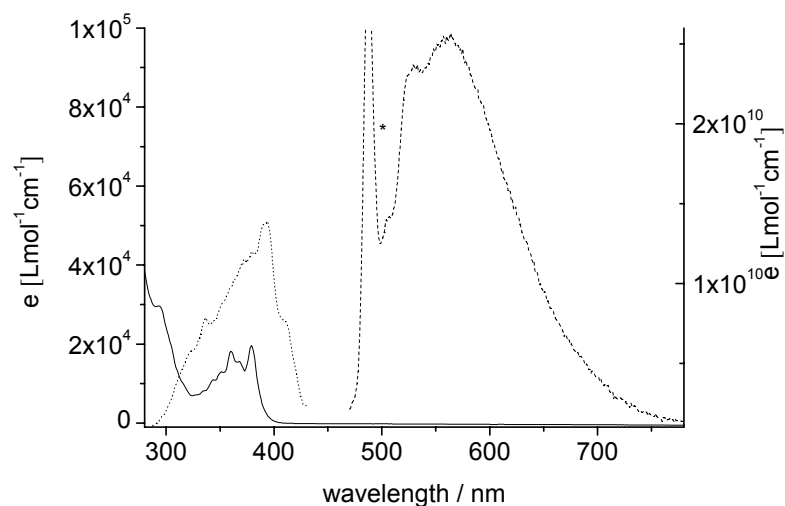

**Figure S5.** Absorption (solid), emission (dashed) and excitation (dotted) spectra of  $[(\text{dppz})\text{Pd}(\text{Me})(\text{Caf})][\text{SbF}_6]$  measured in DMF solution at room temperature.

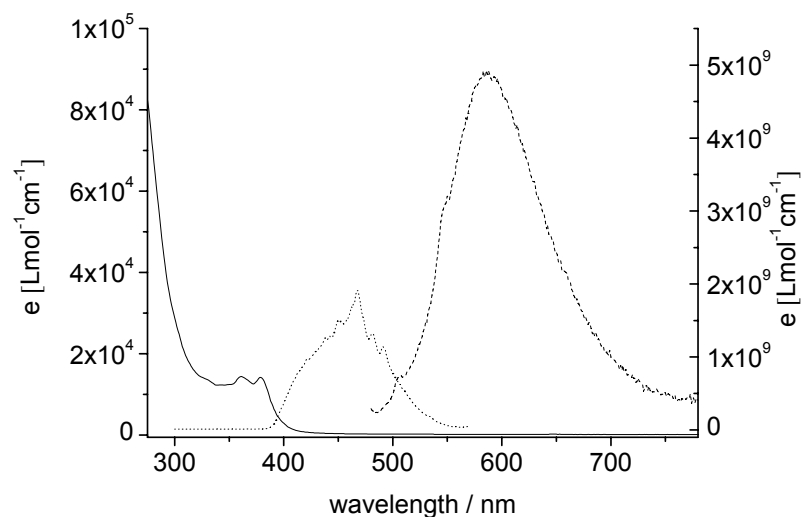

**Figure S6.** Absorption (solid), emission (dashed) and excitation (dotted) spectra of  $[(\text{tfmdppz})\text{Pd}(\text{Me})(\text{Caf})][\text{SbF}_6]$  measured in DMF solution at room temperature.

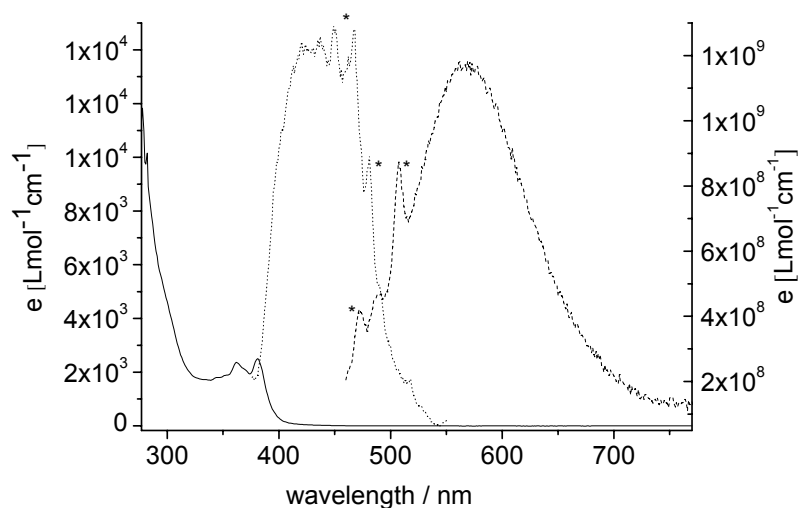

**Figure S7.** Absorption (solid), emission (dashed) and excitation (dotted) spectra of [(dppz)Pd(Me)(1MeUra)] measured in DMF solution at room temperature.

**Table S1.** Complete data of absorption and luminescence measurements

| compound                             | $\tilde{\nu}_{\text{Abs.max}}^a$ | $\tilde{\nu}_{\text{Exc.max}}^a$ | $\tilde{\nu}_{\text{Em.max}}^a$ | Stokes-shift (1) <sup>b</sup> | Stokes-shift (2) <sup>b</sup> |
|--------------------------------------|----------------------------------|----------------------------------|---------------------------------|-------------------------------|-------------------------------|
| adppz                                | 34130 / 32468 / 22371            | 21277                            | 17900                           | 4471                          | 3377                          |
| [(adppz)Pd(Me)(Caf)] <sup>+</sup>    | 32895 / 21186                    | 22222                            | 17065                           | 4121                          | 5157                          |
| dppz                                 | 34130 / 27855 / 26385            | 25000                            | 22222                           | 4163                          | 2778                          |
| [(dppz)Pd(Me)(Caf)] <sup>+</sup>     | 34247 / 27778 / 26385            | 22222                            | 17700                           | 8685                          | 4522                          |
| tfindppz                             | 34130 / 27778 / 26385            | 24390                            | 19200                           | 7185                          | 5190                          |
| [(tfindppz)Pd(Me)(Caf)] <sup>+</sup> | 36765 / 27778 / 26455            | 21277                            | 17100                           | 9355                          | 4177                          |
| cdppz                                | 34247 / 27322 / 25907            | 23810                            | 19400                           | 6507                          | 4410                          |
| [(cdppz)Pd(Me)(Caf)] <sup>+</sup>    | 36363 / 27100 / 25707            | 22222                            | 16000                           | 9707                          | 6222                          |
| dcdppz                               | 33900 / 26954 / 25510            | 20000                            | 18400                           | 7110                          | 1600                          |
| [(dcdppz)Pd(Me)(Caf)] <sup>+</sup>   | 35971 / 26882 / 25445            | 21739                            | 17300                           | 8145                          | 4439                          |
| ndppz                                | 33557 / 26810 / 25575            | 24390                            | 19500                           | 6075                          | 4890                          |
| [(ndppz)Pd(Me)(Caf)] <sup>+</sup>    | 34965 / 26954 / 28169 /<br>25575 | 22222                            | 17400                           | 8175                          | 4822                          |

<sup>a</sup> Absorption (Abs.max), Excitation (Exc.max) and Emission maxima (Em.max) /  $\text{cm}^{-1}$ .

<sup>b</sup> Stokes-shift (1) =  $\tilde{\nu}_{(\text{Abs.max})} - \tilde{\nu}_{(\text{Em.max})} / \text{cm}^{-1}$ ; Stokes-shift (2) =  $\tilde{\nu}_{(\text{Exc.max})} - \tilde{\nu}_{(\text{Em.max})} / \text{cm}^{-1}$ .

**Table S2.** Complete electrochemical data of free ligands and Pd<sup>II</sup> complexes Potentials in V vs. ferrocene/ferrocinium from cyclic voltammetry or square wave voltammetry in 0.1 M DMF/*n*Bu<sub>4</sub>NPF<sub>6</sub> solutions at 298 K; Half wave potentials E<sub>1/2</sub> given for reversible processes, cathodic peak potentials E<sub>pc</sub> given for irreversible processes.

| Compound                             | E <sub>1/2</sub> | E <sub>1/2</sub> or E <sub>pc2</sub> | ΔE <sub>Red1</sub> – E <sub>Red2</sub> | E <sub>pc3</sub> | E <sub>pc4</sub> | solvent            |
|--------------------------------------|------------------|--------------------------------------|----------------------------------------|------------------|------------------|--------------------|
| ndppz                                | -1.08            | -1.53                                | 0.44                                   | -2.73            | -2.80            | CH <sub>3</sub> CN |
| tfindppz                             | -1.45            | -2.29                                | 0.78                                   | -2.55            | -2.94            | CH <sub>3</sub> CN |
| dcdppz                               | -1.45            | -2.20                                | 0.73                                   | -2.34            | -2.87            | CH <sub>3</sub> CN |
| cdppz                                | -1.61            | -2.42                                | 0.79                                   | -2.48            | -2.93            | CH <sub>3</sub> CN |
| dppz                                 | -1.64            | -2.46                                | 0.78                                   | -2.94            | /                | CH <sub>3</sub> CN |
| ndppz                                | -1.18            | -1.73                                | 0.53                                   | -2.91            | /                | DMF                |
| tfindppz                             | -1.47            | -2.31                                | 0.78                                   | -2.87            | /                | DMF                |
| dcdppz                               | -1.35            | -2.16                                | 0.76                                   | -2.77            | /                | DMF                |
| cdppz                                | -1.53            | -2.33                                | 0.76                                   | -2.33            | -2.85            | DMF                |
| dppz                                 | -1.66            | -2.46                                | 0.73                                   | -2.89            | /                | DMF                |
| adppz                                | -1.84            | -1.88                                | 0.51                                   | -2.84            | /                | DMF                |
| [(ndppz)Pd(Me)(Caf)] <sup>+</sup>    | -1.03            | -1.56                                | 0.57                                   | -2.39            | /                | DMF                |
| [(tfindppz)Pd(Me)(Caf)] <sup>+</sup> | -1.20            | -2.02                                | 0.72                                   | -2.38            | /                | DMF                |
| [(dcdppz)Pd(Me)(Caf)] <sup>+</sup>   | -1.23            | -2.06                                | 0.79                                   | -2.33            | /                | DMF                |
| [(cdppz)Pd(Me)(Caf)] <sup>+</sup>    | -1.27            | -2.01                                | 0.73                                   | -2.30            | /                | DMF                |
| [(dppz)Pd(Me)(Caf)] <sup>+</sup>     | -1.44            | -2.21                                | 0.86                                   | -2.89            | /                | DMF                |
| [(adppz)Pd(Me)(Caf)] <sup>+</sup>    | -1.38            | -2.14                                | 0.78                                   | -3.18            | /                | DMF                |
| [(ndppz)Pd(Me)Cl]                    | -1.05            | -1.54 (irr)                          | 0.49                                   | -2.38            | -2.91            | DMF                |
| [(tfindppz)Pd(Me)Cl]                 | -1.25            | -2.08 (irr)                          | 0.73                                   | -2.33            | -2.92            | DMF                |
| [(dcdppz)Pd(Me)Cl]                   | -1.33            | -2.12 (irr)                          | 0.79                                   | -2.33            | -2.51            | DMF                |
| [(cdppz)Pd(Me)Cl]                    | -1.33            | -2.07 (irr)                          | 0.64                                   | -2.30            | -2.81            | DMF                |
| [(dppz)Pd(Me)Cl]                     | -1.35            | -2.06 (irr)                          | 0.71                                   | /                | /                | DMF                |

**Table S3.** Short H...F contacts in the crystal structure of [(dppz)PdMe(Py)][SbF<sub>6</sub>]

|          |          |          |          |
|----------|----------|----------|----------|
| F1...H8  | 2.586(7) | F4...H4  | 2.591(4) |
| F1...H9  | 2.610(8) | F4...H15 | 2.621(6) |
| F2...H5  | 2.695(5) | F5...H2  | 2.420(5) |
| F2...H6  | 2.629(5) | F5...H6  | 2.845(5) |
| F3...H3  | 2.665(5) | F5...H9  | 2.691(6) |
| F3...H14 | 2.538(6) | F6...H5  | 2.573(5) |
| F3...H23 | 2.439(5) | F6...H22 | 2.662(6) |
| F4...H3  | 2.594(4) |          |          |
